# Supplementary material for: Distinctions in source regions and formation mechanisms of secondary aerosol in Beijing from summer to winter
Source: Copernicus journal article supplement (doi:10.5194/acp-2019-16), 2019-03-14
Supplement: Supplementary file 1 [file acp-2019-16-supplement.pdf]

**Supplement of:**

**Distinctions in source regions and formation mechanisms of secondary aerosol in Beijing from summer to winter**

Jing Duan<sup>1,2,3</sup>, Ru-Jin Huang<sup>1,2</sup>, Chunshui Lin<sup>1,2,4</sup>, Wenting Dai<sup>1,2</sup>, Meng Wang<sup>1,2,3</sup>, Yifang Gu<sup>1,2,3</sup>, Ying Wang<sup>1,2,3</sup>, Haobin Zhong<sup>1,2,3</sup>, Yan Zheng<sup>5</sup>, Haiyan Ni<sup>1,2,3,6</sup>, Uli Dusek<sup>6</sup>, Yang Chen<sup>7</sup>, Yongjie Li<sup>8</sup>, Qi Chen<sup>5</sup>, Douglas R. Worsnop<sup>9</sup>, Colin D. O'Dowd<sup>4</sup>, Junji Cao<sup>1,2</sup>

<sup>1</sup>State Key Laboratory of Loess and Quaternary Geology (SKLLQG) and Key Laboratory of Aerosol Chemistry & Physics (KLACP), Institute of Earth Environment, Chinese Academy of Sciences, Xi'an 710061, China

<sup>2</sup>CAS Center for Excellence in Quaternary Science and Global Change, Chinese Academy of Sciences, Xi'an 710061, China

<sup>3</sup>University of Chinese Academy of Sciences, Beijing 100049, China

<sup>4</sup>School of Physics and Centre for Climate and Air Pollution Studies, Ryan Institute, National University of Ireland Galway, University Road, Galway, Ireland

<sup>5</sup>State Key Joint Laboratory of Environmental Simulation and Pollution Control, College of Environmental Sciences and Engineering, Peking University, Beijing 100871, China

<sup>6</sup>Centre for Isotope Research (CIO), Energy and Sustainability Research Institute Groningen (ESRIG), University of Groningen, The Netherlands

<sup>7</sup>Chongqing Institute of Green and Intelligent Technology, Chinese Academy of Sciences, Chongqing 400714, China

<sup>8</sup>Department of Civil and Environmental Engineering, Faculty of Science and Technology, University of Macau, Taipa, Macau

<sup>9</sup>Aerodyne Research, Inc., Billerica, MA, USA

*Correspondence to:* Ru-Jin Huang (rujin.huang@ieecas.cn)

**Table S1.** Summary of mass concentrations of aerosol species, gaseous pollutants and meteorological parameters during entire study and different seasons. PM<sub>1</sub> chemical composition during clean days (C), M-polluted days (M) and H-polluted days (H) in different seasons are also shown.

| Species                                                  | Entire study | Late Summer |      |      | Autumn |      |      |       | Early Winter |      |      |       |
|----------------------------------------------------------|--------------|-------------|------|------|--------|------|------|-------|--------------|------|------|-------|
|                                                          |              | Entire      | C    | M    | Entire | C    | M    | H     | Entire       | C    | M    | H     |
| <b>Aerosol species (<math>\mu\text{g m}^{-3}</math>)</b> |              |             |      |      |        |      |      |       |              |      |      |       |
| PM <sub>1</sub>                                          | 44.7         | 21.6        | 15.6 | 46.9 | 43.3   | 9.3  | 54.2 | 110.5 | 64.3         | 8.1  | 43.5 | 109.7 |
| OA                                                       | 22.4         | 13.8        | 10.5 | 28.1 | 21.2   | 5.8  | 25.5 | 50.8  | 29.6         | 4.5  | 20.4 | 49.4  |
| HOA                                                      | 2.2          | 1.8         | 1.3  | 3.9  | 2.1    | 0.4  | 2.5  | 6.1   | 3.3          | 0.2  | 1.2  | 6.4   |
| COA                                                      | 3.9          | 1.4         | 1.5  | 2.0  | 4.3    | 1.9  | 4.6  | 8.1   | 4.7          | 1.1  | 4.3  | 6.9   |
| CCOA                                                     | 3.1          | 0.7         | 0.5  | 1.7  | 2.0    | 0.6  | 2.3  | 4.6   | 7.7          | 1.1  | 5.3  | 12.8  |
| LSOA                                                     | 9.0          | 3.2         | 2.2  | 6.7  | 9.2    | 1.5  | 10.2 | 25.4  | 12.1         | 1.5  | 7.5  | 20.7  |
| RSOA                                                     | 4.2          | 6.6         | 5.0  | 13.8 | 3.8    | 1.5  | 5.9  | 6.6   | 1.8          | 0.6  | 2.0  | 2.5   |
| SO <sub>4</sub>                                          | 5.6          | 3.1         | 1.9  | 8.0  | 4.8    | 0.8  | 7.6  | 11.0  | 9.6          | 1.5  | 6.5  | 16.5  |
| NO <sub>3</sub>                                          | 8.7          | 1.3         | 0.9  | 3.3  | 9.5    | 0.6  | 12.5 | 27.6  | 12.9         | 0.7  | 8.7  | 23.0  |
| NH <sub>4</sub>                                          | 3.8          | 1.5         | 0.9  | 3.8  | 3.5    | 0.5  | 3.7  | 11.0  | 6.4          | 0.7  | 4.4  | 9.9   |
| Chl                                                      | 0.8          | 0.2         | 0.05 | 0.5  | 0.8    | 0.1  | 0.7  | 2.2   | 1.8          | 0.2  | 1.3  | 3.3   |
| BC                                                       | 3.4          | 1.7         | 1.4  | 3.3  | 3.5    | 1.5  | 4.3  | 7.7   | 3.9          | 0.4  | 2.2  | 7.7   |
| <b>Gaseous pollutants</b>                                |              |             |      |      |        |      |      |       |              |      |      |       |
| SO <sub>2</sub> (ppb)                                    | 5.0          | 3.0         | 2.7  | 3.5  | 4.4    | 3.0  | 4.4  | 6.2   | 7.9          | 3.7  | 5.2  | 11.7  |
| CO (ppm)                                                 | 0.9          | 0.5         | 0.6  | 0.4  | 0.7    | 0.3  | 0.8  | 1.2   | 1.7          | 0.2  | 0.9  | 3.0   |
| NO (ppb)                                                 | 19.1         | 4.7         | 3.7  | 4.2  | 18.1   | 8.9  | 15.5 | 28.2  | 32.7         | 4.3  | 18.9 | 55.9  |
| NO <sub>2</sub> (ppb)                                    | 29.9         | 18.7        | 14.6 | 23.1 | 32.0   | 22.3 | 32.3 | 48.7  | 34.0         | 11.9 | 25.5 | 49.1  |
| O <sub>3</sub> (ppb)                                     | 18.0         | 35.4        | 31.5 | 54.1 | 17.5   | 27.2 | 16.1 | 20.8  | 5.7          | 19.7 | 4.9  | 2.7   |
| <b>Meteorological parameters</b>                         |              |             |      |      |        |      |      |       |              |      |      |       |
| RH (%)                                                   | 72.5         | 71.1        | 71.4 | 64.5 | 69.6   | 56.7 | 82.3 | 75.9  | 73.9         | 34.3 | 79.4 | 82.7  |
| T (°C)                                                   | 12.7         | 23.9        | 24.2 | 27.0 | 14.4   | 17.9 | 14.9 | 14.5  | 1.5          | -3.0 | 1.3  | 2.8   |
| WS (m s <sup>-1</sup> )                                  | 0.95         | 0.88        | 0.89 | 0.93 | 0.97   | 1.23 | 0.63 | 0.55  | 1.26         | 3.60 | 1.12 | 0.63  |

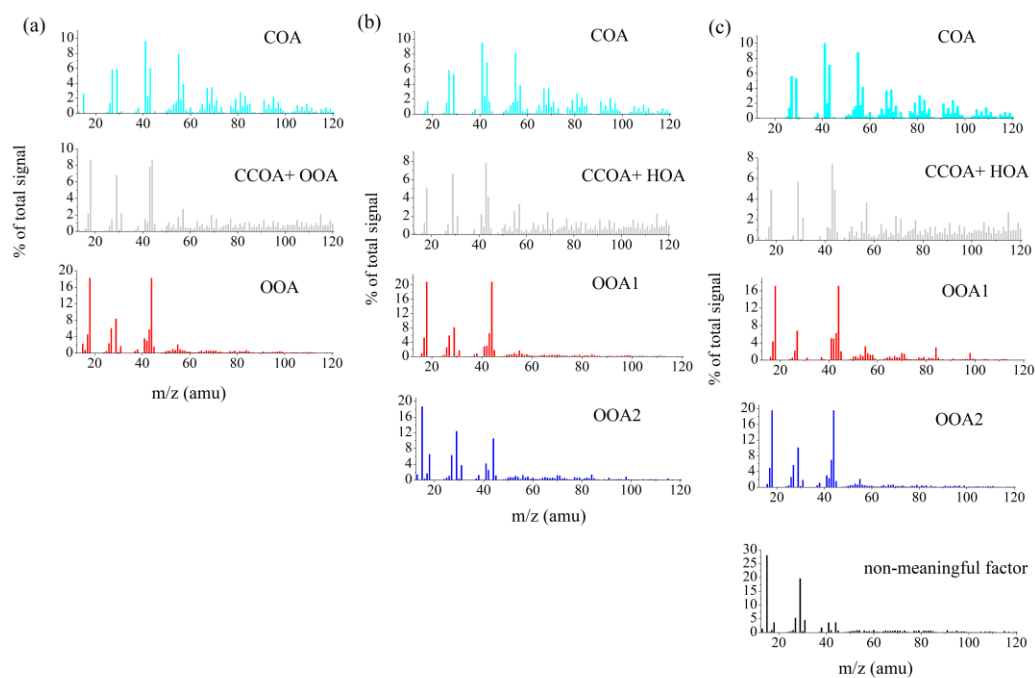

**Figure S1.** PMF profiles of OA sources for 4, 5 and 6 factor solutions.

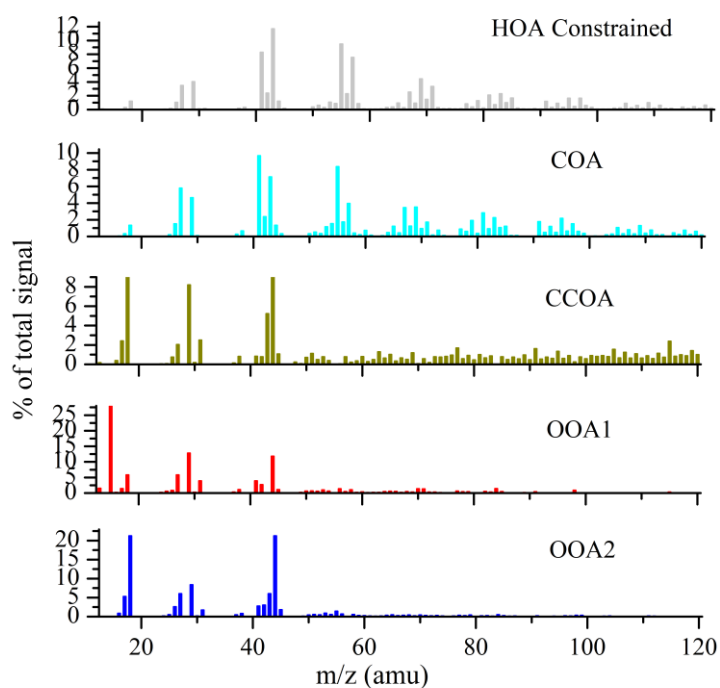

**Figure S2.** ME-2 profiles of OA sources. The HOA profile is from that of Ng et al. (2011b), and the COA profile is from 4-factor PMF result. The others are unconstrained factors.

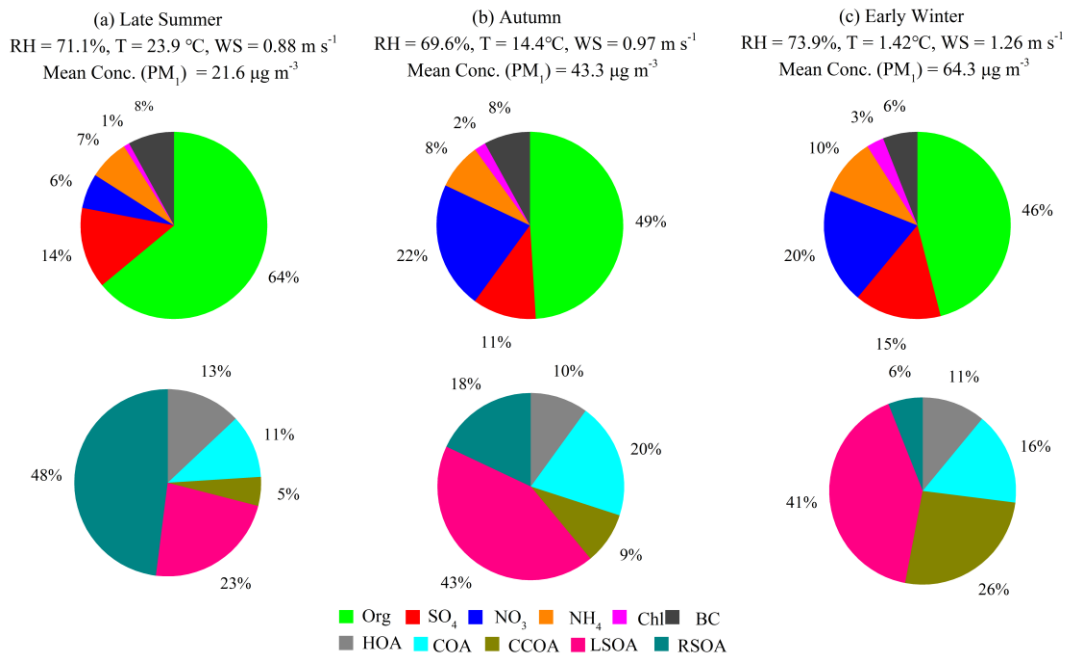

**Figure S3.** Mass fraction of PM<sub>1</sub> species and OA factors in later summer (a), autumn (b) and early winter (c).

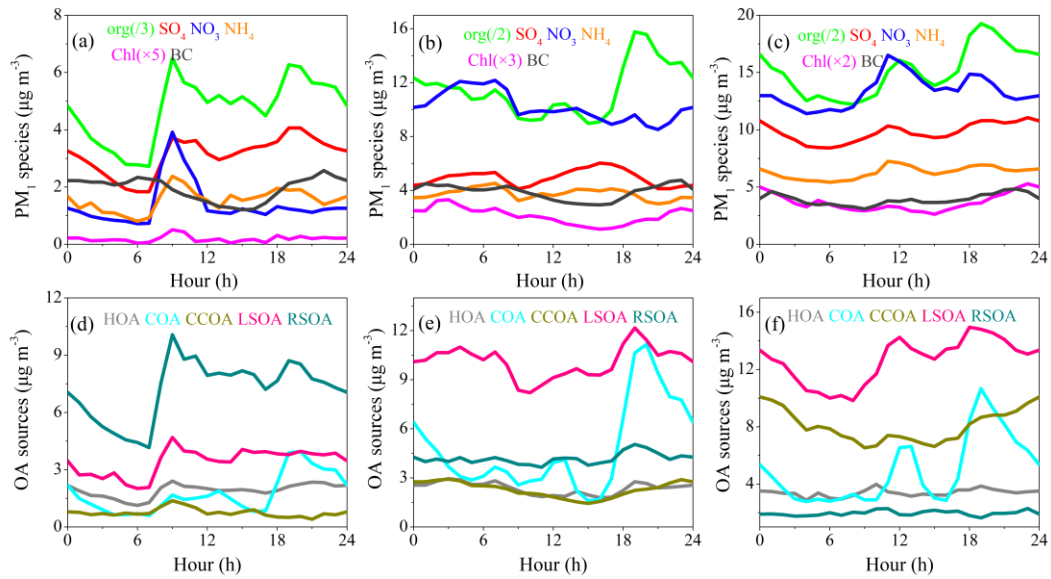

**Figure S4.** Diurnal cycles of PM<sub>1</sub> species and OA factors during late summer (a, d), autumn (b, e) and early winter (c, f).
